# Supplementary material
Source: PubMed Central journal article supplement (PMC3117110)

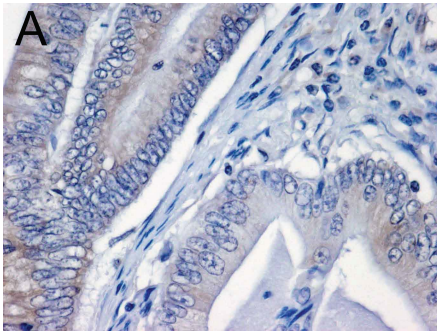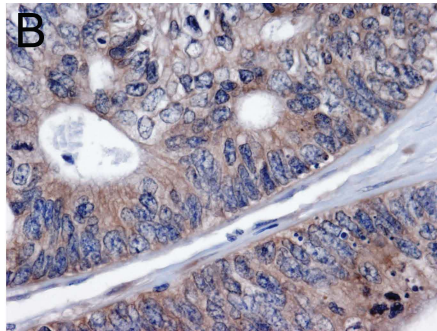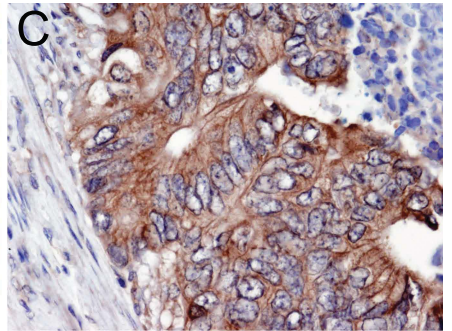

Supplement: NIHMS292022-supplement-1.pdf [file NIHMS292022-supplement-1.pdf]

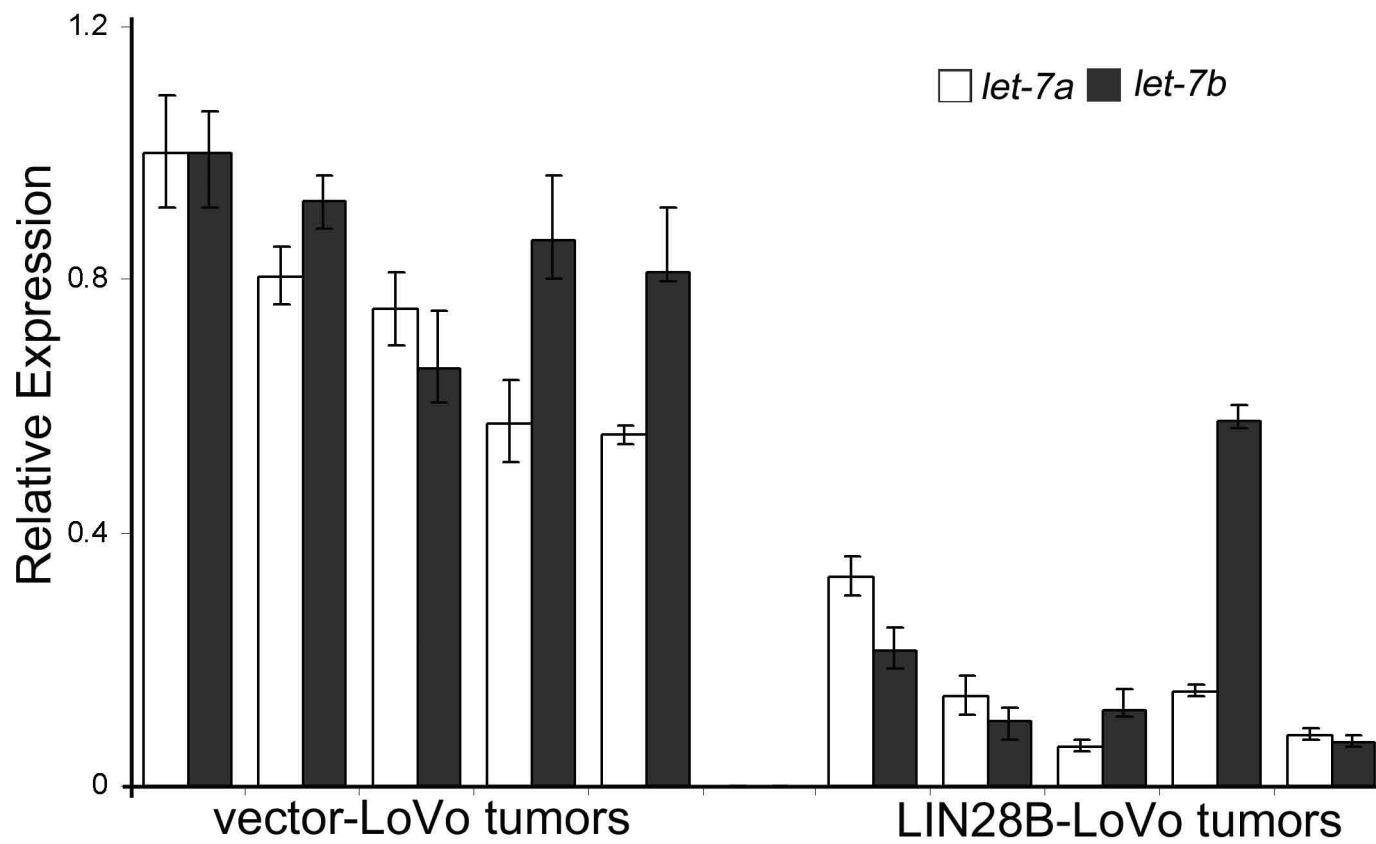

Supplement: NIHMS292022-supplement-2.pdf [file NIHMS292022-supplement-2.pdf]

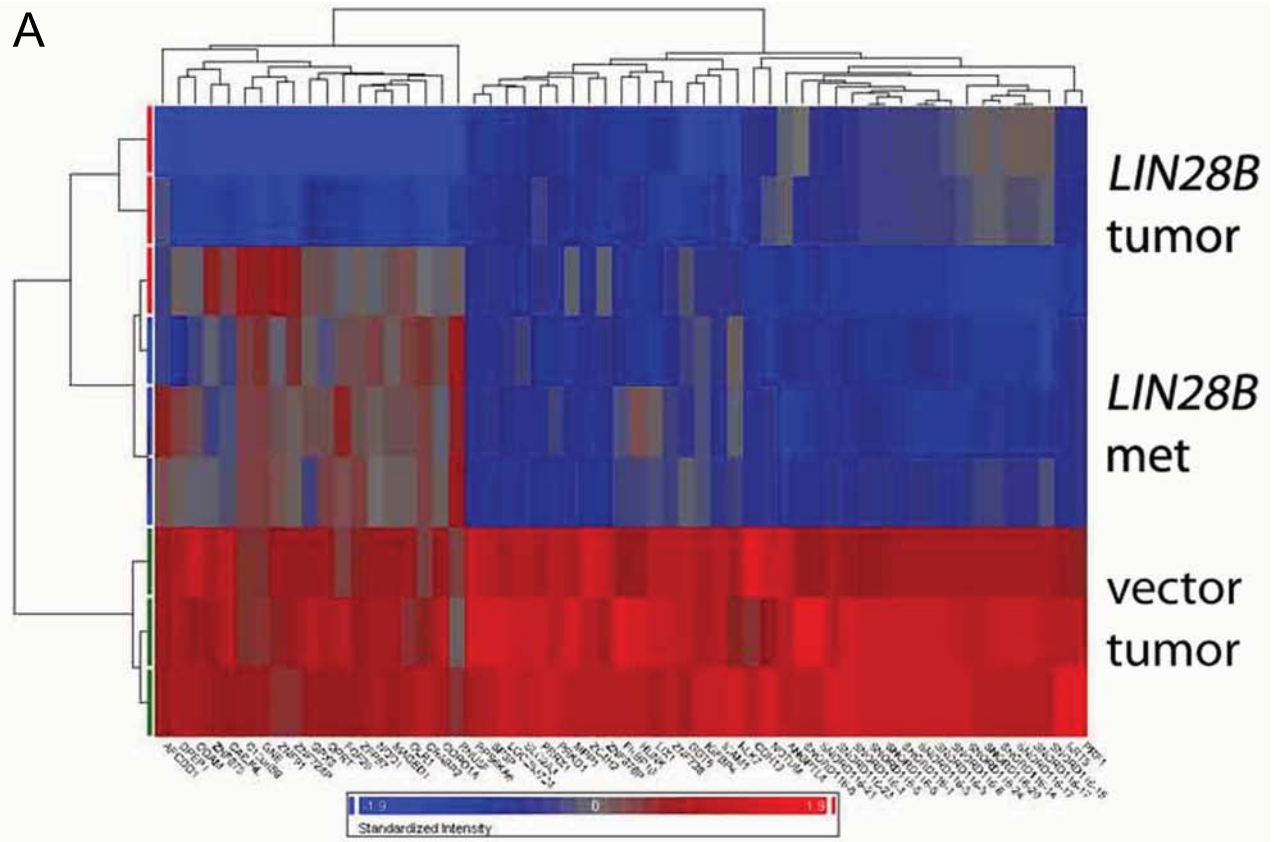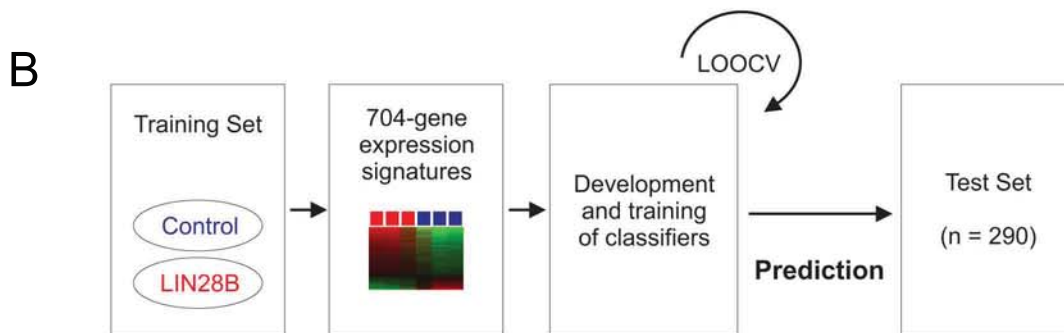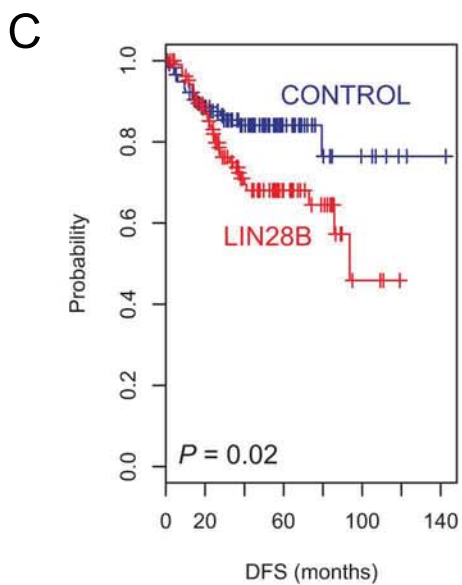

Supplement: NIHMS292022-supplement-3.pdf [file NIHMS292022-supplement-3.pdf]
